# Supplementary material for: Number of Siblings and Social Capital Among Parents Rearing Schoolchildren: Results From the A-CHILD Study
Source: PubMed Central journal article supplement (PMC10409528; doi:10.2188/jea.je20210510), 2023-09-05
Supplement: je-33-478-s001.pdf [file je-33-478-s001.pdf]

**eTable 1.** Characteristics of study sample (n=8,082) and excluded sample owing to missing data on siblings and social capital (n=1,348)

|                               | Study sample<br>(n=8,082) |      | Excluded sample<br>(n=1,348) |      | P-value <sup>a</sup> |
|-------------------------------|---------------------------|------|------------------------------|------|----------------------|
|                               | n                         | %    | n                            | %    |                      |
| Age, years                    |                           |      |                              |      |                      |
| <35                           | 1,221                     | 15.1 | 243                          | 18.0 | <0.001               |
| 35–39                         | 2,177                     | 26.9 | 359                          | 26.6 |                      |
| 40–44                         | 2,744                     | 34.0 | 404                          | 30.0 |                      |
| ≥45                           | 1,897                     | 23.5 | 180                          | 13.4 |                      |
| Missing                       | 43                        | 0.5  | 162                          | 12.0 |                      |
| Sex                           |                           |      |                              |      |                      |
| Female                        | 7,457                     | 92.3 | 1,239                        | 91.9 | 0.65                 |
| Male                          | 625                       | 7.7  | 109                          | 8.1  |                      |
| Household income, million yen |                           |      |                              |      |                      |
| <3.00                         | 535                       | 6.6  | 37                           | 2.7  | <0.001               |
| 3.00–5.99                     | 1,552                     | 19.2 | 39                           | 2.9  |                      |
| 6.00–9.99                     | 1,738                     | 21.5 | 31                           | 2.3  |                      |
| ≥10.0                         | 575                       | 7.1  | 19                           | 1.4  |                      |
| Missing                       | 3,682                     | 45.6 | 1,222                        | 90.7 |                      |
| Medical history               |                           |      |                              |      |                      |
| Cardiovascular disease        | 132                       | 1.6  | 35                           | 2.6  | 0.01                 |
| Asthma                        | 763                       | 9.4  | 133                          | 9.9  | 0.62                 |
| Diabetes                      | 104                       | 1.3  | 7                            | 0.5  | 0.02                 |
| Psychiatric disease           | 419                       | 5.2  | 64                           | 4.7  | 0.50                 |
| Number of children            |                           |      |                              |      |                      |
| 1                             | 1,537                     | 19.0 | 306                          | 22.7 | 0.003                |
| 2                             | 4,008                     | 49.6 | 676                          | 50.1 |                      |
| 3                             | 2,002                     | 24.8 | 291                          | 21.6 |                      |
| 4                             | 402                       | 5.0  | 49                           | 3.6  |                      |
| ≥5                            | 103                       | 1.3  | 19                           | 1.4  |                      |
| Missing                       | 30                        | 0.4  | 7                            | 0.5  |                      |

<sup>a</sup>Differences were tested using Pearson's chi-square test.

**eTable 2.** Type of counselor for Japanese parents receiving social support from at least one person (n=7,780)

| Type of counselor                         | Total |      | Total number of siblings |        |        |        |         | <i>P</i> -value <sup>a</sup> |
|-------------------------------------------|-------|------|--------------------------|--------|--------|--------|---------|------------------------------|
|                                           | n     | %    | 0 (only child)<br>%      | 1<br>% | 2<br>% | 3<br>% | ≥4<br>% |                              |
| Own parents                               | 5,548 | 71.3 | 66.6                     | 73.7   | 72.5   | 63.9   | 50.4    | <0.0001                      |
| Siblings and/or relatives                 | 3,232 | 41.5 | 11.7                     | 37.3   | 47.8   | 55.7   | 63.8    | <0.0001                      |
| Spouse or partner                         | 5,922 | 76.1 | 75.4                     | 76.4   | 77.4   | 73.2   | 65.4    | <0.0001                      |
| Parents-in-law                            | 1,404 | 18.0 | 16.7                     | 18.1   | 18.7   | 18.4   | 12.2    | 0.13                         |
| Neighborhood friends/acquaintances        | 3,693 | 47.5 | 49.4                     | 47.3   | 49.1   | 44.5   | 33.7    | <0.0001                      |
| Non-neighborhood<br>friends/acquaintances | 2,535 | 32.6 | 37.3                     | 32.9   | 32.5   | 28.4   | 27.6    | 0.01                         |
| Work colleagues                           | 1,470 | 18.9 | 19.4                     | 18.2   | 19.6   | 20.4   | 16.3    | 0.40                         |

<sup>a</sup>Differences were tested using Pearson's chi-square test.
